# Supplementary material
Source: ML conference proceedings conference paper supplement (https://openreview.net/forum?id=kj33zJ9Vue)
Supplement: supplementary_material [file attachment]

---

# On permutation symmetries in Bayesian neural network posteriors: Appendix

---

Anonymous Author(s)

Affiliation

Address

email

## 1 A Additional details on the alignment method

2 In the main paper, to align the distributions with respect to permutation matrices we argue to use the  
3 Wasserstein distance rather than the Kullback-Leibler (KL) divergence. Indeed, by considering the KL  
4 divergence  $\text{KL}[P_{\#}q_1 \parallel q_0]$  between Gaussians we have

$$\text{KL}[P_{\#}q_1 \parallel q_0] = \log \det \text{diag}(s_0) - \log \det \text{diag}(Ps_1) + \text{Tr}(\text{diag}(Ps_1s_0^{-1})) + \quad (1)$$

$$(\mathbf{m}_0 - P\mathbf{m}_1)^\top \text{diag}(s_0^{-1})(\mathbf{m}_0 - P\mathbf{m}_1) \quad (2)$$

5 It's easy to verify that the first three terms do not depend on  $P$ , leading to just a distance between  
6 means and disregarding any covariance information. In the figure below, we visualize the difference  
7 between doing linear assignment problem (LAP) with the KL cost and LAP with the Wasserstein cost.

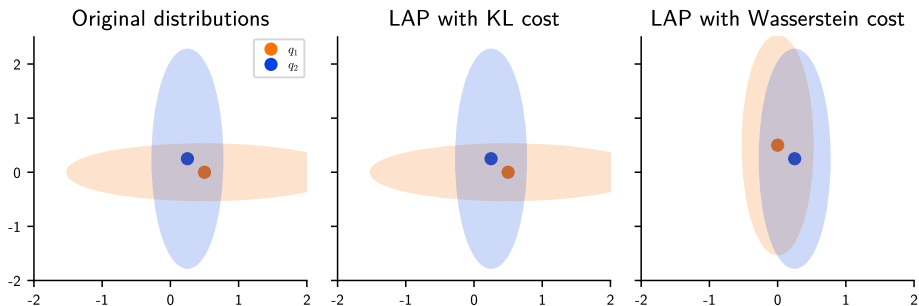

Figure A1: **Alignment using different objectives.** Given two distributions symmetrical w.r.t. the  $y = x$  plane, using the KL cost LAP results in the identity permutation (which fails to recover the symmetry), while the Wasserstein cost better aligns the two distributions

## 8 B Experimental setup

9 Tables 2 and 3 show details on the multilayer perceptrons (MLPs) and convolutional neural networks  
10 (CNNs) base architectures used in our experimental campaign, while Table 1 reports the hyper-  
11 parameters used in the experiments. Note that differently from Entezari et al. [5] and Ainsworth et al.  
12 [2], we don't use data augmentation. A possible protocol for handling data augmentation in Bayesian  
13 neural networks (BNNs) is presented by Osawa et al. [14] and involves carefully tuning the likelihood  
14 temperature to correctly counting the number of data points.

Table 1: Hyperparameters used for the experiments

| Dataset       | CIFAR10  | MNIST    |
|---------------|----------|----------|
| Model         | ResNet20 | MLP      |
| Data Aug.     | False    | False    |
| Batch size    | 500      | 500      |
| Temperature   | 1.0      | 1.0      |
| Test samples  | 128      | 128      |
| Train samples | 1        | 1        |
| VI std. init  | 0.01     | 0.01     |
| Base features | 16       | 512      |
| Prior var     | 0.01     | 0.0025   |
| Learning rate | 0.000001 | 0.000001 |
| Train epochs  | 1000     | 1000     |

Table 2: MLP

| Layer          | Dimensions           |
|----------------|----------------------|
| Linear-ReLU    | $512 \times D_{in}$  |
| Linear-ReLU    | $512 \times 512$     |
| Linear-ReLU    | $512 \times 512$     |
| Linear-Softmax | $D_{out} \times 512$ |

Table 3: ResNet20

| Layer          | Dimensions                                                              |
|----------------|-------------------------------------------------------------------------|
| Conv2D         | $16 \times 3 \times 3 \times D_{in}$                                    |
| Residual Block | $\begin{matrix} 3 \times 3, 16 \\ 3 \times 3, 16 \end{matrix} \times 3$ |
| Residual Block | $\begin{matrix} 3 \times 3, 32 \\ 3 \times 3, 32 \end{matrix} \times 3$ |
| Residual Block | $\begin{matrix} 3 \times 3, 64 \\ 3 \times 3, 64 \end{matrix} \times 3$ |
| AvgPool        | $8 \times 8$                                                            |
| Linear-Softmax | $D_{out} \times 64$                                                     |

## 15 B.1 Computing platform

16 The experiments have been performed using JAX [4] and run on two AWS p4d.24xlarge instances  
 17 with 8 NVIDIA A100 GPUs. Experiments were conducted using in the eu-west-1 region, which has a  
 18 carbon efficiency of 0.62 kgCO<sub>2</sub>eq/kWh. A cumulative of 6500 hours of computation was performed  
 19 on GPUs and it includes interactive sessions as well as small experiments with very low GPU usage,  
 20 providing a pessimistic estimation of the true utilization. Total emissions are estimated to be 1007.5  
 21 kgCO<sub>2</sub>eq of which 100 percents were directly offset by AWS.

## 22 C Additional results

23 We present timings obtained by profiling the time needed to solve the sum of bilinear assignment  
 24 problems (SOLAP) with the Wasserstein cost, as well as the time for the deterministic case [2]. In  
 25 Fig. A2 we show the results for MLP and ResNet20 architectures, varying the model width. It  
 26 is evident that, in the majority of cases, the algorithm completes within a minute. Moreover, as  
 27 anticipated, in case of variational inference (VI) solving our distribution alignment problem for wide  
 28 neural networks is more computationally demanding compared to merely matching weights from  
 29 stochastic gradient descent (SGD) solutions.

30 Finally, we also test our setup on the CIFAR100 dataset [11]. Surprisingly, we were not able to  
 31 replicate the same level of performance as in the other cases. In Fig. A3, we see that, despite  
 32 converging well, we fall short to find zero-barrier solutions. Similarly to the comments of Ainsworth  
 33 et al. [2], we also stress that the failure to align distributions does not rule out the existence of a proper  
 34 permutation map that the algorithm couldn't find. Nonetheless, this raises a number of questions:  
 35 the Bayesian posterior is the product of two ingredients, the prior and the likelihood, conditioned to  
 36 observing a dataset.

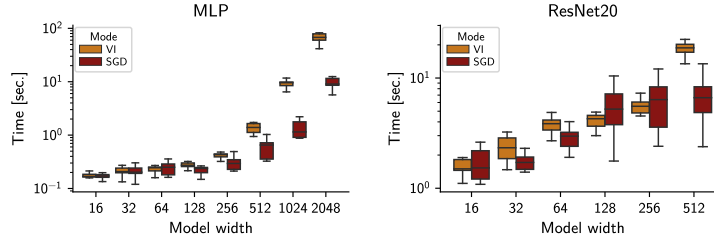

Figure A2: **Timings.** Profile of the algorithms to align the VI solutions and to match weights from SGD solutions.

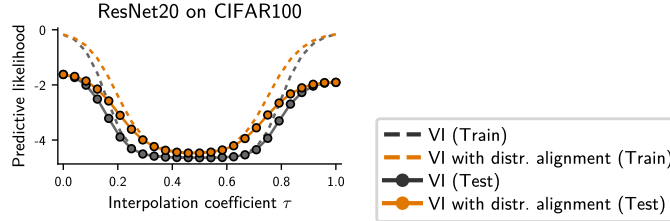

Figure A3: **Alignment failure.** The method proposed fails to recover zero-barrier solutions for CIFAR100.

## 37 D A primer on variational inference for Bayesian neural networks

38 VI is a classic tool to tackle intractable Bayesian inference [9, 3]. VI casts the inference problem into  
 39 an optimization-based procedure to compute a tractable approximation of the true posterior. Assume  
 40 a generic parametric model  $f$  parameterized by some unknown parameters  $\theta$  (i.e.  $f(\cdot, \theta)$ ) and a  
 41 collection of data  $\mathbf{y} \in \mathbb{R}^N$  corresponding to some input points  $\mathbf{X} = \{\mathbf{x}_i \mid \mathbf{x}_i \in \mathbb{R}^{D_{\text{in}}}\}_{i=1, \dots, N}$ . In  
 42 our setting, we have a probabilistic model  $p(\mathbf{y} \mid f(\mathbf{X}; \theta))$  with parameters  $\theta$ , a prior distributions on  
 43 them  $p(\theta)$  and a set of observations  $\{\mathbf{X}, \mathbf{y}\}$ . In a nutshell, the general recipe of VI consists of (i)  
 44 introducing a set  $\mathcal{Q}$  of distributions; (ii) defining a tractable objective that “measure” the distance  
 45 between any arbitrary distribution  $q(\theta) \in \mathcal{Q}$  and the true posterior  $p(\theta \mid \mathbf{y})$ ; and finally (iii) providing  
 46 a programmatic way to find the distribution  $\tilde{q}(\theta)$  that minimizes such distance. In practice,  $q(\theta)$   
 47 has some free parameters  $\nu$  (also known as *variational parameters*), which are optimized such that  
 48 the approximating distribution  $q(\theta; \nu)$  is as closer as possible to the true posterior  $p(\theta \mid \mathbf{y})$ . We can  
 49 derive the variational objective starting from the definition of the KL,

$$\begin{aligned} \text{KL}[q(\theta; \nu) \parallel p(\theta \mid \mathbf{y})] &= \mathbb{E}_{q(\theta; \nu)} [\log q(\theta; \nu) - \log p(\theta \mid \mathbf{y})] = & (3) \\ &= \mathbb{E}_{q(\theta; \nu)} [\log q(\theta; \nu) - \log p(\mathbf{y} \mid \theta) - \log p(\theta)] + \log p(\mathbf{y}) \end{aligned}$$

50 Rearranging we have that

$$\log p(\mathbf{y}) - \text{KL}[q(\theta; \nu) \parallel p(\theta \mid \mathbf{y})] = \mathbb{E}_{q(\theta; \nu)} [\log q(\theta; \nu) - \log p(\mathbf{y} \mid \theta) - \log p(\theta)] \quad (4)$$

51 The r.h.s. of the equation defines our variational objective, also known as evidence lower bound  
 52 (ELBO), that can be arranged as follows,

$$\mathcal{L}_{\text{ELBO}}(\nu) = \underbrace{\mathbb{E}_{q(\theta; \nu)} \log p(\mathbf{y} \mid \theta)}_{\text{Model fitting term}} - \underbrace{\text{KL}[q(\theta; \nu) \parallel p(\theta)]}_{\text{Regularization term}}. \quad (5)$$

53 This formulation highlights the property of this objective, which is made of two components: the first  
 54 one is the expected log-likelihood under the approximate posterior  $q$  and measures how the model fits  
 55 the data. The second term, on the other hand, has the regularization effect of penalizing posteriors  
 56 that are far from the prior as measured by the KL. Before diving into the challenges of optimization  
 57 of the ELBO, we shall spend a brief moment discussing the form of the approximating distribution  $q$ .  
 58 One of the simplest and easier choice is the mean field approximation [7], where each variable  $\theta_i$   
 59 is taken to be independent with respect to the remaining  $\theta_{-i}$ . Effectively, this imposes a factorization  
 60 of the posterior,

$$q(\theta; \nu) = \prod_{i=1}^K q(\theta_i; \nu_i) \quad (6)$$

61 where  $\nu_i$  is the set of variational parameters for the parameter  $\theta_i$ . On top of this approximation,  $q(\theta_i)$   
 62 is often chosen to be Gaussian,

$$q(\theta_i) = \mathcal{N}(\mu_i, \sigma_i^2) \quad (7)$$

63 Now, the collection of all means and variances  $\{\mu_i, \sigma_i^2\}_{i=1}^K$  defines the set of variational parameters  
 64 to optimize.

65 For BNNs the analytic evaluation of the ELBO (and its gradients) is always untractable due the non-  
 66 linear nature of the expectation of the log-likelihood under the variational distribution. Nonetheless,  
 67 this can be easily estimated via Monte Carlo integration [13], by sampling  $N_{\text{MC}}$  times from  $q_\nu$ ,

$$\mathbb{E}_{q(\theta; \nu)} \log p(\mathbf{y} | \theta) \approx \frac{1}{N_{\text{MC}}} \sum_{j=1}^{N_{\text{MC}}} \log p(\mathbf{y} | \tilde{\theta}_j), \quad \text{with } \tilde{\theta}_j \sim q(\theta; \nu) \quad (8)$$

68 In practice, this is as simple as re-sampling the weights and the biases for all the layers  $N_{\text{MC}}$  times  
 69 and computing the output for each new sample.

70 We now have a tractable objective that needs to be optimized with respect to the variational parameters  
 71  $\nu$ . Very often the KL term is known, making its differentiation trivial. On the other hand the expectation  
 72 of the likelihood is not available, making the computation of its gradients more challenging. This  
 73 problem can be solved using the so-called *reparameterization trick* [19, 10]. The reparameterization  
 74 trick aims at constructing  $\theta$  as an invertible function  $\mathcal{T}$  of the variational parameters  $\nu$  and of another  
 75 random variable  $\varepsilon$ , so that  $\theta = \mathcal{T}(\varepsilon; \nu)$ . Generally, a  $\mathcal{T}$  that suits this constraint might not exists;  
 76 Ruiz et al. [18] discuss how to build “weakly” dependent transformation  $\mathcal{T}$  for distributions like  
 77 Gamma, Beta and Log-normal. For discrete distributions, instead, one could use a continuous  
 78 relaxation, like the Concrete [12].  $\varepsilon$  is chosen such that its marginal  $p(\varepsilon)$  does not depend on the  
 79 variational parameters. With this parameterization,  $\mathcal{T}$  separates the deterministic components of  $q$   
 80 from the stochastic ones, making the computation of its gradient straightforward. For a Gaussian  
 81 distribution with mean  $\mu$  and variance  $\sigma^2$ ,  $\mathcal{T}$  corresponds to as simple scale-location transformation  
 82 of an isotropic Gaussian noise,

$$\theta \sim \mathcal{N}(\mu, \sigma^2) \iff \theta = \mu + \sigma\varepsilon \quad \text{with } \varepsilon \sim \mathcal{N}(0, 1). \quad (9)$$

83 This simple transformation ensures that  $p(\varepsilon) = \mathcal{N}(0, 1)$  does not depends on the variational param-  
 84 eters  $\nu = \{\mu, \sigma^2\}$ . The gradients of the ELBO can be therefore computed as

$$\nabla_\nu \mathcal{L}_{\text{ELBO}} = \mathbb{E}_{p(\varepsilon)} [\nabla_\theta \log p(\mathbf{y} | \theta) |_{\theta=\mathcal{T}(\varepsilon; \nu)} \nabla_\nu \mathcal{T}(\varepsilon; \nu)] - \nabla_\nu \text{KL} [q(\theta; \nu) || p(\theta)] . \quad (10)$$

85 The gradient  $\nabla_\theta \log p(\mathbf{y} | \theta)$  depends on the model and it can be derived with automatic differentiation  
 86 tools [1, 15], while  $\nabla_\nu \mathcal{T}(\varepsilon; \nu)$  doesn’t have any stochastic components and therefore can be known  
 87 deterministically. Note that the reparameterization trick can be also used when the KL is not  
 88 analytically available. In that case, we would end up with,

$$\nabla_\nu \mathcal{L}_{\text{ELBO}} = \mathbb{E}_{p(\varepsilon)} [\nabla_\theta \log p(\mathbf{y} | \theta) + \log q(\theta; \nu) - \log p(\theta)]_{\theta=\mathcal{T}(\varepsilon; \nu)} \nabla_\nu \mathcal{T}(\varepsilon; \nu) \quad (11)$$

89 Roeder et al. [17] argue that when we believe that  $q(\theta; \nu) \approx p(\mathbf{y} | \theta)$ , Eq. (11) should be preferred  
 90 over Eq. (10) even if computing analytically the KL is possible. Note that this case is very unlikely for  
 91 BNN posteriors, and that the additional randomness introduced by the Monte Carlo estimation of the  
 92 KL could be harmful.

93 In case of large datasets and complex models, the formulation summarized in Eq. (10) can be  
 94 computationally challenging, due to the evaluation of the likelihood and its gradients  $N_{\text{MC}}$  times.  
 95 Assuming factorization of the likelihood,

$$p(\mathbf{y} | \theta) = p(\mathbf{y} | f(\mathbf{X}; \theta)) = \prod_{i=1}^N p(y_i | f(\mathbf{x}_i; \theta)) \quad (12)$$

96 this quantity can be approximated using mini-batching [6, 8]. Recalling  $\mathbf{y}$  as the set of labels of  
 97 our dataset with  $N$  examples, by taking  $\mathcal{B} \subset \mathbf{y}$  as a random subset of  $\mathbf{y}$ , the likelihood term can be  
 98 estimated in an unbiased way as

$$\log p_\theta(\mathbf{y} | \theta) \approx \frac{N}{M} \sum_{y_i \sim \mathcal{B}} \log p(y_i | \theta). \quad (13)$$

99 where  $M$  is the number of points in the minibatch. At the cost of increase “randomness”, we can use  
 100 Eq. (10) to compute the gradients of the ELBO with the minibatch formulation in Eq. (13). Stochastic  
 101 optimization, e.g. any version of SGD, will converge to a local optimum provided with a decreasing  
 102 learning rate and sufficient gradient updates [16].

103 **References**

- 104 [1] M. Abadi, A. Agarwal, P. Barham, E. Brevdo, Z. Chen, C. Citro, G. S. Corrado, A. Davis, J. Dean,  
105 M. Devin, S. Ghemawat, I. Goodfellow, A. Harp, G. Irving, M. Isard, Y. Jia, R. Jozefowicz, L. Kaiser,  
106 M. Kudlur, J. Levenberg, D. Mané, R. Monga, S. Moore, D. Murray, C. Olah, M. Schuster, J. Shlens,  
107 B. Steiner, I. Sutskever, K. Talwar, P. Tucker, V. Vanhoucke, V. Vasudevan, F. Viégas, O. Vinyals, P. Warden,  
108 M. Wattenberg, M. Wicke, Y. Yu, and X. Zheng. TensorFlow: Large-Scale Machine Learning on  
109 Heterogeneous Systems, 2015. Software available from tensorflow.org.
- 110 [2] S. Ainsworth, J. Hayase, and S. Srinivasa. Git Re-Basin: Merging Models modulo Permutation Symmetries.  
111 In *The Eleventh International Conference on Learning Representations*, 2023.
- 112 [3] D. M. Blei, A. Kucukelbir, and J. D. McAuliffe. Variational Inference: A Review for Statisticians. 112  
113 (518):859–877, 2017.
- 114 [4] J. Bradbury, R. Frostig, P. Hawkins, M. J. Johnson, C. Leary, D. Maclaurin, G. Necula, A. Paszke,  
115 J. VanderPlas, S. Wanderman-Milne, and Q. Zhang. JAX: Composable Transformations of Python+NumPy  
116 Programs, 2018.
- 117 [5] R. Entezari, H. Sedghi, O. Saukh, and B. Neyshabur. The Role of Permutation Invariance in Linear Mode  
118 Connectivity of Neural Networks. In *International Conference on Learning Representations*, 2022.
- 119 [6] A. Graves. Practical Variational Inference for Neural Networks. In J. Shawe-Taylor, R. S. Zemel, P. L.  
120 Bartlett, F. Pereira, and K. Q. Weinberger, editors, *Advances in Neural Information Processing Systems 24*,  
121 pages 2348–2356. Curran Associates, Inc., 2011.
- 122 [7] G. E. Hinton and D. van Camp. Keeping the Neural Networks Simple by Minimizing the Description  
123 Length of the Weights. In *Proceedings of the Sixth Annual Conference on Computational Learning Theory*,  
124 1993. ISBN 0897916115.
- 125 [8] M. D. Hoffman, D. M. Blei, C. Wang, and J. W. Paisley. Stochastic Variational Inference. 14(1):1303–1347,  
126 2013.
- 127 [9] M. I. Jordan, Z. Ghahramani, T. S. Jaakkola, and L. K. Saul. An Introduction to Variational Methods for  
128 Graphical Models. 37(2):183–233, 1999-11-01.
- 129 [10] D. P. Kingma and M. Welling. Auto-Encoding Variational Bayes. In *International Conference on Learning  
130 Representations*, 2014.
- 131 [11] A. Krizhevsky. Learning multiple layers of features from tiny images. Technical report, 2009.
- 132 [12] C. J. Maddison, A. Mnih, and Y. W. Teh. The Concrete Distribution: A Continuous Relaxation of Discrete  
133 Random Variables. In *Proceedings of the 5th International Conference on Learning Representations*.  
134 OpenReview.net, 2017.
- 135 [13] N. Metropolis and S. Ulam. The monte carlo method. 44(247):335–341, 1949. PMID: 18139350.
- 136 [14] K. Osawa, S. Swaroop, M. E. E. Khan, A. Jain, R. Eschenhagen, R. E. Turner, and R. Yokota. Practical Deep  
137 Learning with Bayesian Principles. In *Advances in Neural Information Processing Systems*, volume 32,  
138 pages 4287–4299. Curran Associates, Inc., 2019.
- 139 [15] A. Paszke, S. Gross, F. Massa, A. Lerer, J. Bradbury, G. Chanan, T. Killeen, Z. Lin, N. Gimselshein,  
140 L. Antiga, A. Desmaison, A. Kopf, E. Yang, Z. DeVito, M. Raison, A. Tejani, S. Chilamkurthy, B. Steiner,  
141 L. Fang, J. Bai, and S. Chintala. PyTorch: An Imperative Style, High-Performance Deep Learning Library.  
142 In H. Wallach, H. Larochelle, A. Beygelzimer, F. d’Alché Buc, E. Fox, and R. Garnett, editors, *Advances  
143 in Neural Information Processing Systems 32*, pages 8024–8035. Curran Associates, Inc., 2019.
- 144 [16] H. Robbins and S. Monro. A Stochastic Approximation Method. 22(3):400–407, 1951.
- 145 [17] G. Roeder, Y. Wu, and D. Duvenaud. Sticking the Landing: Simple, Lower-Variance Gradient Estimators  
146 for Variational Inference. In I. Guyon, U. von Luxburg, S. Bengio, H. M. Wallach, R. Fergus, S. V. N.  
147 Vishwanathan, and R. Garnett, editors, *Advances in Neural Information Processing Systems 30*, pages  
148 6925–6934, 2017.
- 149 [18] F. R. Ruiz, M. Titsias, and D. Blei. The Generalized Reparameterization Gradient. In D. Lee, M. Sugiyama,  
150 U. Luxburg, I. Guyon, and R. Garnett, editors, *Advances in Neural Information Processing Systems*,  
151 volume 29. Curran Associates, Inc., 2016.
- 152 [19] T. Salimans and D. A. Knowles. Fixed-Form Variational Posterior Approximation through Stochastic  
153 Linear Regression. 8(4):837–882, 2013.
